# Supplementary material for: Incentivising safe sex: a randomised trial of conditional cash transfers for HIV and sexually transmitted infection prevention in rural Tanzania
Source: HighWire-hosted journal article supplement (doi:10.1136/bmjopen-2011-000747), 2012-01-01
Supplement: bmjopen-2011-000747-s1.pdf [file bmjopen-2011-000747-s1.pdf]

**This document contains copies of:**

- 1) First Submission Decision letter and our answers to it. Our answers in bold: p. 2**
- 2) First submission reviews and our answers (in bold) to them: p. 11**
- 3) Second submission decision: p. 20**
- 4) Second submission review and our answers (in bold) to it: p.30**

**1) First round decision letter and our answers in bold.**

MS ID#: BMJ/2011/883504

MS TITLE: Incentivizing safe sex: A randomized trial of conditional cash transfers (CCTs) for HIV/STI prevention in rural Tanzania

Thank you for sending us this paper, which we were pleased to have the chance to consider, and enjoyed reading. We recognise its potential importance and relevance to general medical readers, but I am afraid that we have not yet been able to reach a final decision on it. This is because several important aspects of the work still need clarifying.

We hope very much that you will be willing and able to revise your paper as explained below in the report from the manuscript meeting, so that we will be in a better position to understand your study and decide whether the BMJ is the right journal for it. We hope, too, that you will submit your revised paper (via your author area at our online editorial office <http://submit.bmj.com>) within one month.

Looking forward to hearing from you again and, we hope, to reaching a decision.

Best wishes

Domhnall

Domhnall MacAuley  
BMJ Editorial

**Report from the BMJ's manuscript meeting**

We are able to accept only a small proportion even of the good articles submitted to us. A little over 10 % of articles reach this stage, and to do so they have to have passed preliminary screening by one or more of the editors, have received sufficiently positive external peer review, and have been discussed at the manuscript meeting.

At the manuscript meeting each article is discussed by the Editor or deputy, the rest of the BMJ's international team of research editors, and two invited

advisers: one statistician and one clinical editorial adviser. As well as the scientific merits of the paper we take into account each paper's originality and interest to a general readership in comparison with other submitted papers. We take reviewers' reports fully into account too, but the final decision on acceptance or rejection of a paper rests with the Editor.

These comments are an attempt to summarise the discussions at the manuscript meeting. They are not an exact transcript.

Members of the committee were:

Trish Groves (Chair), Jon Deeks (ext Statistician), Elizabeth Loder, Wim

Weber, Tobias Kurth, Kirsten Patrick, Domhnall MacAuley.

\* Randomisation of spouses. There is likely to be correlation in couples so

should it be analysed as a cluster. The unadjusted results show little effect. There is only a benefit is when adjusted. Also no account for the number of comparisons. We suspect that with adjustment, the clustering effect

may disappear. The message of the paper might change. There are problems in the method and clustering of spouse.

**We agree that correlation in couples is likely and we therefore have adapted our clustering of the standard errors to account for this. We now cluster standard errors both at the household and at sub-village levels, accounting for the possible correlation within couples and the variation in selection probability at that sub-village level. All tables have been revised accordingly. We have also updated the statistical methods sub-section to describe this. These changes do not alter the main messages of the paper.**

**Regarding the multiple comparisons, we had always planned to look primarily at the effect after one year, i.e. at round 4, expecting that the effect would become stronger over time during the previous rounds. We therefore do not think it is necessary to adjust for multiple comparisons across rounds.**

\* How did the authors choose the variables- is it based on the p values? More variables in the final model. There are many p values in table one but not for primary hypothesis. We need more explanation of how the variables were selected etc

**For Table 1 and adjusted models, we chose standard socio-demographic variables such as age, gender, education, marital status, socio-economic status and income which are expected to influence behaviors. (We did not choose these variables based on p-values). We**

**also included baseline STI levels, but could not include the combined prevalence measure at baseline because Mycoplasma Genitalium was not tested at baseline due to logistical constraints.**

\*There is a potential fundamental flaw. If one tests positive in the study, one doesn't get any benefit. If looking for the money- one could get a sample from someone else which may bias the study. Participants may try to avoid a positive test.

**The reviewers are correct to point out that pronounced 'gaming behavior' by participants in the CCT groups would introduce bias into the study. We adopted several strategies to reduce the likelihood that gaming could occur. Specimen collection among females was always observed by a nurse at the testing station. For males, the specialized receptacle used to collect a urine sample was provided only after dropping off personal belongings upon checking in to the testing section of the study station. Males were asked to urinate into the study receptacle in the vicinity of the study station. They would have had to risk being observed attempting to transfer the contents of 'healthy' urine into the study receptacle, and this behavior was not reported by the study staff.**

**We have introduced a more detailed description to clarify this point in the outcomes sub-section of the methods section.**

\*Power calculation difficult to follow. Need to explain exactly what the power calculation was done in terms of time measurement. Needs to be more clear- especially about reporting clearly the primary outcome in the abstract.

**The sample size sub-section has now been revised to reflect the power calculations for the analysis reported. The previous power calculations were those used when the project was initially conceived, but these were updated to the currently reported power calculations during the final stages of project design and recruitment planning.**

**In the abstract, we now clearly states the 4 sexually transmitted infections combined for the primary outcome measure both in the methods and the results headings.**

\*Abstract- says is a proof of concept study.

**By identifying this as a 'proof of concept' study, we hoped to acknowledge the importance of testing on a small scale whether individuals will respond to financial incentives to change their sexual behavior before evaluating whether the intervention can be delivered on a larger scale. This resonates with common understanding, but we are aware that the biomedical field employs a more precise definition (e.g. Any Phase 1b, or Phase 2 trial, regardless of sponsorship, that could generate, confirm, provide an adequate benefit-risk, or establish a dose response relationship that could be used as the basis for a decision to move forward with a registration strategy).**

**For clarity, we have removed the reference to “proof of concept” in the abstract and the body of the text.**

\* Doesn't seem to be a good idea to pay people to have a negative sample and then allow people to take their own sample. This sounds like a major problem (It may not be feasible to do it otherwise)

**Please see above our answer clarifying our methods for specimen collection and the more detailed description to clarify this point in the outcomes sub-section of the methods section.**

\* Good clinical question, the introduction was good but the methods are very confusing.

**We have made significant changes to the methods section in responding to this and other reviewers' comments. We now provide additional information on specimen collection procedures, more detail on process aspects related to administering the intervention, and greater clarity around the trial design, the primary outcome measure and its rationale and the power calculations. We have also updated the statistical methods sub-section to clarify the relative risks reported and to describe the clustering of standard errors both at the household and at sub-village levels, accounting for the possible correlation within couples and the variation in selection probability at that sub-village level.**

\* Need to know a lot more about the methods of sample collection. Authors need to be clear on the primary outcome.

**Please see above our answer clarifying our methods for specimen collection and the more detailed description to clarify this point in the outcomes sub-section of the methods section.**

Technical editor's report

- Please provide positions (job titles) for each author<P>

To do.

- The abstract must be structured with regulation headings (Objective, Design, Setting, Participants, (Interventions,) Main outcome measures, Results, Conclusions)

**We have done this.**

- Abbreviations should not be used and should be spelt out each time (HIV and AIDS are OK)

**We have done this.**

- For all confidence intervals, use format "xx to xx" (not "xx - xx") <P>

**We have done this.**

- Please restate the main findings in the first paragraph of the Discussion

**We have done this.**

End matter

- Please provide a summary points box comprising two or three points under each of the headings "What is already known on this topic" and "What this study adds"<P>

**We have done this.**

**We have done this.**

**We have done this.**

by both of the reviewers. You will find these at our online editorial office (at <http://submit.bmj.com>) in your author area, under this manuscript number. Please also respond to these additional comments by the committee:

\*  
\*  
\*  
\*

When you revise and return your manuscript, please take note of all the following points. The commonest reason for us to have return papers to authors after revision is that some of these points have not been attended to and we cannot, therefore, proceed to acceptance. Even if an item, such as a competing interests statement, was present and correct in the original draft of your paper, please check that it has not slipped out during revision.

a. In your covering letter please provide, point by point, your replies to the comments made by the reviewers and the editors, and please explain how you have dealt with them in the paper. It may not be possible to respond in detail to all these points in the paper itself, so please do so in the covering letter.

b. We will need the full version of your paper.

c. Please include the items below in your revised paper to comply with BMJ style

Essential items for BMJ articles

\* the title of the article should include the study design eg "a retrospective analysis of hospital episode statistics"

\* details of ethics committee approval, or a statement that it was not required (see <http://resources.bmj.com/bmj/authors/editorial-policies/guidelines>)

\* Competing interests. A declaration about competing interests needs to be made in the manuscript. This should be composed after each author has filled in the form at [www.icmje.org/coi\\_disclosure.pdf](http://www.icmje.org/coi_disclosure.pdf), and the corresponding author should keep the completed forms in case they are required later. Please then add to the manuscript a statement in the following format:

"All authors have completed the Unified Competing Interest form at [www.icmje.org/coi\\_disclosure.pdf](http://www.icmje.org/coi_disclosure.pdf) (available on request from the corresponding author) and declare that (1) [initials of relevant authors] have support from [name of company] for the submitted work; (2) [initials of relevant authors] have [no or specified] relationships with [name of companies] that might have an interest in the submitted work in the previous 3 years; (3) their spouses, partners, or children have [specified] financial relationships that may be relevant to the submitted work; and (4) [initials of relevant authors] have no [or specified] non-financial interests that may be relevant to the submitted work."

Please see <http://resources.bmj.com/bmj/authors/editorial-policies/competing-interests>.

\* contributorship statement+ guarantor  
(see <http://resources.bmj.com/bmj/authors/article-submission/authorship-contributorship>)

\* copyright statement/ licence for publication

All authors have completed the Unified Competing Interest form at [www.icmje.org/coi\\_disclosure.pdf](http://www.icmje.org/coi_disclosure.pdf) (available on request from the corresponding author) and declare: no support from any organisation for the submitted work [or describe if any]; no financial relationships with any organisations that might have an interest in the submitted work in the previous three years [or describe if any], no other relationships or activities that could appear to have influenced the submitted work [or describe if any].

NB - The corresponding author must collect Unified Competing Interest forms from all authors and summarise their declarations as above within the manuscript. You do NOT need to send copies of the forms to the BMJ. For further guidance see <http://resources.bmj.com/bmj/authors/editorial-policies/competing-interest>

\* signed patient consent form(s), if the article gives enough personal information about any patient(s): this sometimes occurs even in research papers - for example in a table giving demographic and clinical information

about a small subgroup in a trial or observational study, or in quotes/tables in a qualitative study (see [http://resources.bmj.com/bmj/authors/editorial-policies/copy\\_of\\_patient-confidentiality](http://resources.bmj.com/bmj/authors/editorial-policies/copy_of_patient-confidentiality))

- \* for a clinical trial, the trial registration number and name of register - in the last line of the structured abstract

- \* a data sharing statement such as "Data sharing: technical appendix, statistical code, and dataset available from the corresponding author at <email address or url>". If there are no such further data available, please use this wording: "Data sharing: no additional data available"

- \* please write the discussion section of your paper in a structured way, to minimise the risk of careful explanation giving way to polemic.

Please follow this structure:

- \* statement of principal findings of the study

- \* strengths and weaknesses of the study

- \* strengths and weaknesses in relation to other studies, discussing important differences in results and what your study adds. Whenever possible please discuss your study in the light of relevant systematic reviews and meta-analyses (eg Cochrane reviews)

- \* meaning of the study: possible explanations and implications for clinicians and policymakers and other researchers; how your study could promote better decisions

- \* unanswered questions and future research

- \* What this paper adds/what is already known box (as described at <http://resources.bmj.com/bmj/authors/types-of-article/research>)

- \* funding statement (see <http://resources.bmj.com/bmj/authors/article-submission/article-requirements>)

- \* statement of the independence of researchers from funders (see <http://resources.bmj.com/bmj/authors/article-submission/article-requirements>)

- \* for studies funded or sponsored by industry (see <http://resources.bmj.com/bmj/authors/article-submission/article-requirements>):

- \* a statement describing the role of the study sponsor(s), if any, in study design; in the collection, analysis, and interpretation of data; in the writing of the report; and in the decision to submit the article for publication

- \* assurance, in the cover letter, that a clinical trial funded by a pharmaceutical or other commercial company follows the guidelines on good publication practice (see <http://resources.bmj.com/bmj/authors/article-submission/article-requirements>)

- \* inclusion in the list of contributors the name(s) any professional medical writer(s), specifying in the formal funding statement for the article who paid the writer. Writers and authors must have access to relevant data while writing articles.

\* structured abstract (see <http://resources.bmj.com/bmj/authors/types-of-article/research>)

\* summary statistics to clarify your message

We do want your piece to be easy to read, but also want it to be as scientifically accurate as possible. Please include in the results section of your structured abstract (and, of course, in the article's results section) the following terms, as appropriate:

For a clinical trial:

- Absolute event rates among experimental and control groups
- RRR (relative risk reduction)
- NNT or NNH (number needed to treat or harm) and its 95%

confidence

interval (or, if the trial is of a public health intervention, number helped per 1000 or 100,000)

For a cohort study:

- Absolute event rates over time (eg 10 years) among exposed and non-exposed groups

- RRR (relative risk reduction)

For a case control study:

- OR (odds ratio) for strength of association between exposure and outcome

For a study of a diagnostic test:

- Sensitivity and specificity
- PPV and NPV (positive and negative predictive values)

## 2) First submission reviews and our answers (in bold) to them.

### Reviewer 1 Comments...

Name: James Hargreaves

Position: Senior Lecturer, LSHTM

This is a potentially important paper - although I am not sure it is of sufficient scientific importance for publication for a general readership such as in the BMJ. It is not suitable for publication in the BMJ its current format – though this could probably be rectified.

I strongly encourage the authors to consider making the changes suggested here with regard the format of reporting - and resubmitting to the BMJ or to another public health / AIDS / STI journal. These are important, truly intersectoral studies – and I wish to encourage them. There is growing understanding of the importance of conditional cash transfers, and other social development and financial incentivisation programmes, for public health – and much interest in this within the public health sector. Much expertise in the design and delivery of these programmes lies outside the health sector as exemplified by this author group. There is much to learn in either direction between researchers in the economics and those in the public health field as this strand of research continues. One area of very clear difference is in normative approaches to reporting. I think this is an area where the public health / medical field has much to offer and I genuinely hope these authors will consider reporting their results in a format that facilitates publication in a high impact public health journal, and, even more importantly, facilitates greater understanding in the public health field and greater collaboration across disciplines.

**Thank you for your comments about the interest of the study and the need for interdisciplinary exchanges. We have followed your recommendations and those of the editors to improve the reporting of our results.**

Specific comments

Reporting

I refer the authors to the CONSORT statement and associated papers that outline approaches to reporting the results of clinical trials in medical / public health journals, and to literature on economic interventions reported in public health journals that adopt these standards – one example being the IMAGE study

published by Pronyk, Hargreaves et al in the Lancet 2006. As examples:

- A participant flow diagram is required, and would probably remove the need for the recruitment and numbers analysed sections of the results. Some aspects of the section “participant flow” should be in the methods (eg that potential participants were randomly selected from Ifakara DHSS), while the numbers would probably also appear in the diagram.

**We have included a participant flow diagram that is included as figure 1 (separate file) and further described under the participant flow sub-section in the results section. The selection from the Ifakara Health and Demographic Surveillance System is described under the participants sub-section in the methods section.**

- It is important to stipulate primary outcome measures from secondary ones and to identify when the specific analysis reported was planned (at study design; prior to a final data set being available; or during analysis of the final dataset)

**In the outcomes sub-section of the methods section, we define our primary outcome measure: “The primary outcome measure, as defined in the study protocol, is the round-specific combined point prevalence of the four sexually transmitted infections that were regularly tested – *Chlamydia trachomatis*, *Neisseria gonorrhea*, *Trichomonas vaginalis*, and *Mycoplasma genitalium* – at months 4, 8, and 12. “**

**This primary outcome measure was planned at the study design in order to have sufficient power. We now say it explicitly in the text.**

- there should be coherence between the methods of analysis implied by the sample size calculation and those conducted (the sample size calc refers to a log rank test, but this analysis does not appear to have been conducted). When the sample size was calculated had the details of the combined endpoint been pre-specified?

**The sample size sub-section has now been revised to reflect the power calculations for the analysis reported. The previous power calculations were those used when the project was initially conceived, but these were updated to the currently reported power calculations during the final stages of project design and recruitment planning.**

- The results in tables 2/3 should include N,s and %s as well as measures of effect. Table 1 – for binary or categorical variables – should report these as n’s / %s rather than “sample means” of binary variables.

**We have made the suggested changes in all tables.**

- The BMJ has previously published good guidelines for structured discussions – that start with a clear statement of the findings as the authors see them in light of their a priori hypotheses. Its not quite clear to me what this statement should say – partly because as I have said above its not very clear what the primary outcome analysis was and when this was specified. It might say that there is from this trial some evidence that a high value CCT, but not a lower value CCT, was associated with decreased prevalence of STIs, but that its unclear what behavioural changes led to this shift and secondary outcome data do not necessarily support the suggestion that this was due to a shift towards sexual behaviour that would reduce risk of HIV in this population.

**As suggested, we have added a statement at the beginning of the discussion section describing the main findings of the study.**

Other methodological comments

The rationale for a combined endpoint is unclear, and is perhaps difficult to justify – for reasons the authors allude to in their discussion. At the least more discussion of problems in interpretation should be discussed. The 4-bacterial STI endpoint appears to have been dominated by trichomonas – though we do not currently have any baseline or follow up data on mycoplasma genitalium so its unclear whether this was common or how many people had co-infections. The infections each have different epidemiologies, and in turn this epidemiology is different to that of HIV – which is referred to in the title of the paper and appears to be the real motivation behind the study. There are, for example differences in the age-specific prevalence of HIV and the bacterial STIs used which mean that great great caution should be taken in inferring that any effect on eg trichomonas or a bacterial STI composite could necessarily have any influence on HIV epidemiology. This is particularly important if there is any possibility that an influence of the intervention might have been to change the age of sexual partners – which is highly plausible in the case of this intervention. (I know of conference papers from Ross and White on this subject – I don't know if published). As the authors do point out – there is also the issue of treatment for bacterial STIs – which might have differed between arms here but would have had no influence on HIV epidemiology and might imply little or no change in sexual behaviour attributable to the intervention. Were sexual behaviour data not captured at all? There are well-described limitations to these data but they seem essential to at least try to get a handle on what it was that actually changed between the groups here.

I can perhaps see a rationale for the combined endpoint if this directly links

to the “condition” attached to the cash transfer – but overall I think my preference in design would have been not to use a composite marker. I would certainly encourage the authors to report in a lot more detail what happened over time to each of the specific STIs. Graphs showing the unadjusted prevalence results (and confidence intervals) over time for each of the STIs in I and C groups – and perhaps also shown stratified by sex – would be particularly useful as an adjunct to the reporting of hypothesis tests on the composite outcome.

**The measure of combined point prevalence was constructed at study design to ensure sufficient power to detect differences in the control and treatment groups in response to the intervention (the conditional cash transfer). While it would have been interesting to study specific trends in prevalence rates of the various STIs tested over time, we were not powered to do so, and in any case, these specific trends would yield more insight into the specific transmission patterns of each STI and the susceptibility of the research population to infection than into sexual practices, per se. Our objective was in some ways much narrower than this, as we were seeking sufficient power to detect differences that would indicate changes in behavior as a result of the intervention, rather than transmission patterns of different STIs within this population. The impact of financial incentives on behavior relating to sexual health was in fact confirmed by our study, although the biological outcomes cannot be used to infer the relative importance of STI treatment seeking behavior versus a reduction in risky sexual activity (e.g. increased condom use, number of partners). It is true as the reviewer states that this result does not confirm a reduced risk of infection for HIV in this population, it does point to the importance of a behavioral pathway (via treatment seeking behavior or changing sexual practices).**

**In the text (outcome sub-section of the methods section), we have strengthened the rationale for reliance on the composite marker.**

**As requested, we are also providing as a supplemental table including the prevalence by study arm for each STI at each round. We provide it as additional information for the reviewers and editors, but we would think that because our study was not powered to detect reduction in individual STI prevalence and because of space limitation that table should not be included in the published paper. Of course, if the referees and editors think otherwise, we would be happy to include in this or another format.**

**As far as sexual behavior data are concerned, we have collected quantitative and qualitative data. We are developing separate manuscript for its analysis and it has been analyzed in the following PhD dissertation:**

Packel, Laura J. Who Changes How: Strategies and Motivation for Risk Reduction Behaviors in the Context of an Economic--based HIV Prevention Intervention in Tanzania. PhD Dissertation, University of California at Berkeley, 2010.

#### Process data

For a complex intervention such as that reported on here it seems essential to report data on “process” as is recommended now for trials of complex interventions in public health (Anne Oakleys group have been particularly active and have published on this in the BMJ). I could imagine a number of forms such data might have taken – but the overall aim of such data would to convey to the critical reader things like: was the intervention delivered as intended; was it acceptable and accessed by participants; did intermediary markers (such as sexual behaviour) change in the direction hypothesised etc. There are obvious issues of space limitation – but some data of this type seem essential here.

**We collected a significant amount of process data in conducting this study. As the reviewer indicates, space limitation makes it difficult to provide the details that would be of interest to many readers. However, we include some information about whether the intervention was acceptable and accessed by participants and how it was perceived.**

**We refer the reviewer to the participant flow diagram, and have added a process sub-section in the results section. We are copying here this sub-section:**

#### ***“Process***

The intervention was well accepted and accessed by the study participants as indicated in the participant flow and the low attrition numbers. Further, study participants randomized into the conditional cash transfer arms declared that the financial incentives motivated them to modify their behavior. In the high-value conditional cash transfer arm 317(59.0%) declared that the money motivated them “very much” to change their behavior and 67(12.5%) stated that it motivated them “somewhat”. In the low value conditional cash transfer arm, those numbers are 194(37.4%) for “very much” and 107(20.6%) for “somewhat”.”

#### Detailed comments

The term “group randomised trial” has a specific meaning – the randomisation of groups – and is confusing here. The trial appears to be an unblinded, individually randomised and controlled trial.

**We have made the suggested modifications in the abstract and the trial design sub-section of the methods section.**

The authors use the term “risk ratio” throughout – I think what they present are Odds Ratios from logistic regression models. Risk Ratios in epidemiology refer to ratios of cumulative incidence proportions – here we are talking about relative odds of prevalence. This is an important distinction – particularly so as the outcome is not particularly rare.

**What we are presenting are relative risks, i.e. the probability of being STI positive in the intervention group, divided by the probability of being STI positive in the treatment group. The term relative risk ratio can be confusing, thus we now instead use the clearer term “relative risk” in the statistical methods.**

I’m also not sure about the emphasis on “proof of concept” – if this phrase is to be used the concept in question should be much more clearly articulated – and the discussion of limitations should highlight how proof of this concept relates to other relevant concepts. For example, I don’t think that this study in anyway proves the concept that cash transfers can influence sexual behaviour – no data on this were collected and the overall balance from outcome results suggests that at least those behaviours relevant to shifts in HIV were not achieved. The abstract must stipulate something about what the “condition” was and how this was monitored.

**We have removed the reference to “proof of concept” in the abstract and the body of the text.**

The additional complexity of a sub-village level randomisation intended to allow the study of “potential peer-effects” is interesting but complex and requires a bit more detail in the limitations section. The inclusion of a fixed term for sub-village in the analysis appears to be intended to “re-correct” the results for this aspect of the design I think (we don’t see here any of these analysis on peer-effects – so in the context of this paper this design aspect feels like a limitation, though there may have been interesting reasons for this). However, there are greater difference that one would normally expect in a randomised trial between the unadjusted and adjusted results, and I wonder whether this is partly due to this group level random selection step (given that there were only 10 sub villages, and this step therefore may well have introduced imbalance). However, it might also be related to the problem of non-collapsibility of Odds

Ratios from cohorts. It may be useful to provide some more detailed baseline data on the differences between villages at baseline – and how the stratified sampling might have led to some of the baseline differences described. More on steps taken to ensure randomisation was truly blind would have been useful. As it reads it has the potential to be very easily influenced at field level. At least this should be reflected in the limitations.

**First, we note that there were 10 villages and 50 sub-villages. It is true that we introduced indicator variables for each sub-village in the adjusted models to account for the different selection probability (and potentially associated peer-effects) at the sub-village level. We have added one sentence in the limitation section to account for this.**

**“In order to study potential peer-effects, in randomly selected sub-villages, the probability of selection in the intervention arm was 75% and in the other sub-villages, it was 25%. This might have led to baseline imbalances. For this reason, we included sub-village indicator variables in the adjusted models. This might explain some of the differences between the results from the unadjusted and the adjusted models”.**

**Randomization was not blind. Participants were not blinded to arm assignment since awareness of their eligibility for the conditional cash transfer was a critical component of the intervention. We believe the reviewer refers to the possibility of manipulation of the randomization at the field level. We think our very transparent procedures eliminated this risk. We added in the randomization sub-section of the methods section that the randomization step took place in public view, minimizing the potential for manipulation.**

---

#### [Reviewer 2 Comments...](#)

Name: Dr Surinder Singh

Position: Senior Lecturer in General Practice

Firstly, a word of caution. There are some quite intricate statistics used in this paper and I am no expert (though, importantly I managed to acquire some help with this in that I consulted one of my senior 'stats' colleagues in the dept). If it is likely that this paper is published it ought to be looked at independently from a statistical point of view.

I liked this paper - not simply because of the subject material but because it highlights an important, perhaps all-to-simple, way of reducing high-risk behaviour in a certain population. The results are fascinating.

The introduction is fine along with the methods and the trial design, including a description of the participants and interventions. One question: I wondered why one of the key STIs being incentivised was mycoplasma genitalium (MG) when it seemed to be an unfamiliar infection to the clinicians (page 8). I understand that HIV was also not included for genuine reasons. The role of MG seemed to be ambiguous since there was no testing at baseline.

**Mycoplasma Genitalium was included in the primary study endpoint calculation to increase power. However, we did not tie the CCT payments to participants to a negative test result for m Gen. While m Gen has been shown to be incontrovertibly linked to risky sexual activity, there is some uncertainty around transmission pathways. Rather than risk penalizing participants from testing positive if it was unrelated to risky behavior, we chose to use the aggregate results in the composite measure to increase power for the study. We have modified the sentence about the lack of familiarity of participants and clinicians with m Gen, and replaced it with an explanation of why m Gen can be used to increase power but is less appropriate for conditionality.**

I also have a question about sample size (page 10); the description is that a log rank test is being used, however the results/tables show logistic regression (which is the entirely appropriate tool to use) - does the initial description need minor modification?

**As indicated in the response to the editor's comments, the sample sub-section has now been revised to reflect the power calculations for the analysis reported. The previous power calculations were those used when the project was initially conceived, but these were updated to the currently reported power calculations during the final stages of project design and recruitment planning. As per the reviewer's intuition, we too had initially considered the log rank test to be most appropriate. However, fieldwork in preparation for project launch suggested the strong possibility of time-varying effect sizes, which led us to instead prefer an approach that would estimate separate models at each post-treatment time point.**

A couple of questions/comments about the tables:

Table 1: Do we need columns 3 & 5? My understanding that as these are baseline descriptive results 'P' values are not necessary. This may be a debatable point? Also in columns 1 & 2 the figures are presented as fractions of 1 (0.499 & 0.511); would percentages be clearer (perhaps with standard deviations)?

**We have modified the tables to include percentages, but we have kept the p-values in table 1 to underline the few imbalances at baseline.**

Tables 2/3: Fairly clear - though why is mycoplasma genitalium included; see my comments above about MG.

**We added Mycoplasma genitalium to increase statistical power. See discussion above.**

Discussion - I think this is fine and is a well-written account of the what the trial has shown, including within that a robust examination of the limitations. I agree that some of the findings are perverse (positive results only seen at specific points) - but further study may shed light on this.

Generalizability: again I agree and this is well-written. For those unfamiliar with "proof of concept" - might this warrant a definition or description?

Abstract: I think this is fine and describes well what follows in the trial.

### **3) Second submission decision**

To: Damien de Walque <ddewalque@worldbank.org>  
From: dmacauley@bmj.com  
Subject: BMJ BMJ/2011/883504- Manuscript Decision  
Cc:

BMJ/2011/883504

Incentivizing safe sex: A randomized trial of conditional cash transfers  
(CCTs) for HIV and sexually transmitted infection prevention in rural Tanzania

Dear Dr de Walque

Thank you for sending us this paper and giving us the chance to consider your work, which we enjoyed reading. We recognise the work involved in revising the manuscript to this stage and thank you for sending us this version. We asked our statistician to take a further look at the paper. He has, unfortunately, raised a number of issues relating to the paper. These do appear to be rather important and we would be unable to publish the manuscript in its current form. You will find our statisticians report on the web. I would ask you to respond to each of the points raised. Please supply your response point by point and indicate where in the manuscript you have made the changes. Some of these issues are quite fundamental and large sections of the paper will need to be rewritten. I am sorry to ask you to do this at this stage but we take our statisticians advice very seriously and we would be unable to consider your paper in its current format.

We hope that you will be able to revise and resubmit the paper and send it

back to us within one month. Please upload the revised version as a Word document via your author area at our online editorial office (<http://submit.bmj.com>) - do not resubmit the manuscript as a PDF because our system will not be able to process that.

All original research in the BMJ is published with open access. The full text online version of your article, if accepted after revision, will be the indexed citable version (full details are at <http://resources.bmj.com/bmj/about-bmj/the-bmjs-publishing-model>), while the print BMJ will carry an abridged version of your article, usually a few weeks afterwards.

We would also like you to write an abridged version of the article for the print BMJ - what is essentially an evidence abstract called BMJ pico and then email it to [pico.bmj@bmjgroup.com](mailto:pico.bmj@bmjgroup.com) (more details below on how to write this using a template).

If we ultimately offer you publication of your article we will be asking you to pay the BMJ a publication fee if you are able to claim that amount from your funder. Consideration of your paper is not related to whether you can or cannot pay the fee, and you need do nothing now. If we accept your paper we will write to you again to ask whether you can claim the fee from your funder.

However, because publication of research on [bmj.com](http://bmj.com) is definitive and is not simply interim "epublication ahead of print",

if you do not wish to abridge your article using BMJ pico you will be able to opt for online only publication. Please let us know if you would prefer this option.

Best wishes

Domhnall

Domhnall MacAuley

BMJ Editorial

Report from the BMJ's manuscript meeting

We are able to accept only a small proportion even of the good articles submitted to us. A little over 10 % of articles reach this stage, and to do so they have to have passed preliminary screening by one or more of the editors, have received sufficiently positive external peer review, and have been discussed at the manuscript meeting.

At the manuscript meeting each article is discussed by the Editor or deputy, the rest of the BMJ's international team of research editors, and two invited advisers: one statistician and one clinical editorial adviser. As well as the scientific merits of the paper we take into account each paper's originality and interest to a general readership in comparison with other submitted papers. We take reviewers' reports fully into account too, but the final decision on acceptance or rejection of a paper rests with the Editor.

These comments are an attempt to summarise the discussions at the manuscript meeting. They are not an exact transcript.

Members of the committee were: xxx (chair), yyy (statistician), zzz (editorial adviser), [and list other eds who took part]

Decision: provisional acceptance

Detailed comments from the meeting:

First and foremost, please revise your paper to respond to all of the comments by both of the reviewers. You will find these at our online editorial office (at <http://submit.bmj.com>) in your author area, under this manuscript number.

Please also respond to these additional comments by the committee:

\*

\*

\*

\*

When you revise and return your manuscript, please take note of all the following points. The commonest reason for us to have return papers to authors after revision is that some of these points have not been attended to and we cannot, therefore, proceed to acceptance. Even if an item, such as a competing interests statement, was present and correct in the original draft of your

paper, please check that it has not slipped out during revision:

a. In your covering letter please provide, point by point, your replies to the comments made by the reviewers and the editors, and please explain how you have dealt with them in the paper. It may not be possible to respond in detail to all these points in the paper itself, so please do so in the covering letter.

b. We will need the full version of your paper. If it is accepted it will then be edited, proofed, and - after your approval - published on bmj.com with open access. This open access Online First article will not be a pre-print. It will represent the full, citable, publication of that article.

At the time of publication on bmj.com the bibliographic information is forwarded to PubMed and other indexing agencies, so the article can be searched for and cited (the citation format appears at the top of the online article). Full details are at <http://resources.bmj.com/bmj/about-bmj/the-bmjs-publishing-model>).

The citation will be year, volume, elocator (a unique identifier for that article): eg BMJ 2008;337:a145 — and this is what will appear in Medline, PubMed, and other bibliographical indexes. We will give this citation in print and online, and you will need to use it when you cite your article.

c. We would also like you to write an abridged version of the article for the print BMJ - what is essentially an evidence abstract called BMJ pico. To do this please use the appropriate template for your study's design. Please be reassured that it doesn't take long to complete this. When your BMJ pico is ready please email

it to [pico.bmj@bmjgroup.com](mailto:pico.bmj@bmjgroup.com). The templates for you to download are at

<http://resources.bmj.com/bmj/authors/bmj-pico>

You'll also find there more information about BMJ pico, some frequently asked questions, some published examples, and a report of the surveys we conducted with authors about BMJ pico.

Please include the items below in the revised manuscript to comply with BMJ style:

- \* the title of the article should include the study design eg "a retrospective analysis of hospital episode statistics"

- \* details of ethics committee approval, or a statement that it was not required (see <http://resources.bmj.com/bmj/authors/editorial-policies/guidelines>)

- \*

Please complete the following statement and add it to your manuscript

"All authors have completed the Unified Competing Interest form at [www.icmje.org/coi\\_disclosure.pdf](http://www.icmje.org/coi_disclosure.pdf) (available on request from the corresponding author) and declare: no support from any organisation for the submitted work OR [author initials] had support from [name of organisation] for the submitted work; no financial relationships with any organisations that might have an

interest in the submitted work in the previous 3 years OR [author initials] [had specified relationship] with [name of organisation] in the previous 3 years; no other relationships or activities that could appear to have influenced the submitted work OR [initials of relevant authors] [had specified relationships or activities of this type]"

Guidance and examples can be found at

<http://resources.bmj.com/bmj/authors/editorial-policies/competing-interests>

Each author should download and complete a copy of the disclosure form

[www.icmje.org/coi\\_disclosure.pdf](http://www.icmje.org/coi_disclosure.pdf).

They should keep a copy of the form and send a copy to the corresponding author. They do NOT need to send a copy to the BMJ.

Please see <http://resources.bmj.com/bmj/authors/editorial-policies/competing-interests>.

\* contributorship statement+ guarantor

(see <http://resources.bmj.com/bmj/authors/article-submission/authorship-contributorship>)

\* copyright statement/ licence for publication (see

<http://resources.bmj.com/bmj/authors/checklists-forms/licence-for-publication>)

\* signed patient consent form(s), if the article gives enough personal information about any patient(s): this sometimes occurs even in research papers - for example in a table giving demographic and clinical information

about a small subgroup in a trial or observational study, or in quotes/tables in a qualitative study - (see [http://resources.bmj.com/bmj/authors/editorial-policies/copy\\_of\\_patient-confidentiality](http://resources.bmj.com/bmj/authors/editorial-policies/copy_of_patient-confidentiality))

\* for a clinical trial, the trial registration number and name of register – in the last line of the structured abstract

\*a data sharing statement such as "Data sharing: technical appendix, statistical code, and dataset available from the corresponding author at <email address or url>". If there are no such further data available, please use this wording: "Data sharing: no additional data available"

\* please write the discussion section of your paper in a structured way, to minimise the risk of careful explanation giving way to polemic.

Please follow this structure:

\* statement of principal findings of the study

\* strengths and weaknesses of the study

\* strengths and weaknesses in relation to other studies, discussing important differences in results and what your study adds. Whenever possible please discuss your study in the light of relevant systematic reviews and meta-analyses (eg Cochrane reviews)

\* meaning of the study: possible explanations and implications for clinicians and policymakers and other researchers; how your study could promote better decisions

\* unanswered questions and future research

\* please note, too, that the article's introduction should cover no more than three paragraphs, focusing on the research question and your reasons for asking it now

\* What this paper adds/what is already known box (as described at <http://resources.bmj.com/bmj/authors/types-of-article/research>)

\* funding statement (see <http://resources.bmj.com/bmj/authors/article-submission/article-requirements>)

\* statement of the independence of researchers from funders (see <http://resources.bmj.com/bmj/authors/article-submission/article-requirements>)

\* for studies funded or sponsored by industry (see <http://resources.bmj.com/bmj/authors/article-submission/article-requirements>):

\* a statement describing the role of the study sponsor(s), if any, in study design; in the collection, analysis, and interpretation of data; in the writing of the report; and in the decision to submit the article for publication

\* assurance, in the cover letter, that a clinical trial funded by a pharmaceutical or other commercial company follows the guidelines on good publication practice (see <http://resources.bmj.com/bmj/authors/article-submission/article-requirements>)

\* inclusion in the list of contributors the name(s) any professional medical writer(s), specifying in the formal funding statement for the article who paid the writer. Writers and authors must have access to relevant data while

writing articles.

\* structured abstract (see <http://resources.bmj.com/bmj/authors/types-of-article/research>)

\* summary statistics to clarify your message

We do want your piece to be easy to read, but also want it to be as scientifically accurate as possible. Please include in the results section of your structured abstract (and, of course, in the article's results section) the following terms, as appropriate:

For a clinical trial:

- Absolute event rates among experimental and control groups
- RRR (relative risk reduction)
- NNT or NNH (number needed to treat or harm) and its 95% confidence interval (or, if the trial is of a public health intervention, number helped per 1000 or 100,000)

For a cohort study:

- Absolute event rates over time (eg 10 years) among exposed and non-exposed groups
- RRR (relative risk reduction)

For a case control study:

- OR (odds ratio) for strength of association between exposure and outcome

For a study of a diagnostic test:

- Sensitivity and specificity
- PPV and NPV (positive and negative predictive values)

4) Second submission review and our answer (in bold) to it.

## Comments

**BMJ/2011/883504**

**Incentivizing safe sex: A randomized trial of conditional cash transfers (CCTs) for HIV and sexually transmitted infection prevention in rural Tanzania**

Damien de Walque, William H Dow, Rose Nathan, Ramadhani Abdul, Faraji Abilahi, Erick Gong, Zachary Isdahl, Julian Jamison, Boniphace Jullu, Suneeta Krishnan, Albert Majura, Edward Miguel, Jeanne Moncada, Sally Mtenga, Matthew Alexander Mwanyangala, Laura Packel, Julius Schachter, Kizito Shirima, and Carol A Medlin

**Decision:** Provisional Acceptance/Request Revision; **Decision Date:** 3 Oct 2011

**Date Received:** 17 Sep 2011

**Editor:** Domhnall MacAuley

**Previous manuscript ID:** BMJ/2011/883504

**Article Types:** Research

**Corresponding Author:** Damien de Walque

**Keywords:** None

**Supplemental Files:** 6

[Comments](#)

---

[Comments...](#)

Name: Jon Deeks

Position: Professor of Biostatistics

This manuscript reports results of a randomized trial of financial incentives to increase safer sexual behaviours. The study did not proceed as planned, and the results do not provide convincing evidence that the intervention works. The authors find a significant effect at one time point using an adjusted analysis, and interpret their findings as being more conclusive than probably can be justified.

**We have been more explicit on the smaller sample size than originally anticipated in the “Sample size” section (this was the only key aspect in which the study did not proceed as planned). We have qualified our results in the abstract, the first paragraph of the discussion section and the summary points box.**

1. There appears to be a degree of post hoc rationalization of sample size

calculations which is not made entirely clear to the reader, with a discrepancy between the sample size calculation reported in the study protocol and the calculation reported in the paper. The authors do acknowledge at the end of the sample size calculation section that they had initially intended to recruit more participants but they do not explicitly state that the calculation which is reported was undertaken post hoc and based upon the incidence observed in the study. The protocol reports a calculations based on detecting (relative) differences of a 30% magnitude or greater in the treatment arm compared to the control arm with incidence rates varying between 15%-20% across research sites and drop-out rates as high as 20% per year giving a total sample size of 3000 individuals. The paper states that the power calculation was based on an incidence rate of 12%, controlling for one baseline measure for a one-third reduction requiring 2400 individuals with no mention of any drop-out.

**In the revised “Sample size” section we have now explicitly indicated that the power calculation presented is an ex-post calculation based on the observed properties of the actual recruited sample and infection rates. In the original manuscript submission we had presented the power calculations from the study protocol, but were asked to remove these. We agree with the earlier reviewers that the power calculations corresponding to our actual data analysis are most directly relevant for readers.**

2. Calculation of P-values between randomized groups at baseline is illogical – the P-values indicate the probability that differences have occurred by chance – as all differences are created by randomization, they must have occurred by chance, so why calculate a probability? What is important is the magnitude of the differences, not the P-values. Please remove the P-values from Table 1 and the baseline data section of the results. The use of 2 decimal places on the percentages in this table is also not justified – it implies excessive precision.

**We have removed the p-values from table 1 and from the baseline data section of the results. We have also removed the second decimal from table 2.**

3. There is no mention in the statistical methods whether an intention-to-treat process was followed for the analysis and how missing data were handled (although there is a section describing how much missing data existed).

**We have added the following sentences to the beginnng of the statistical methods section to clarify these two points:**

“Each individual was coded as per their initial randomized assignment as per an intent-to-treat design. However, individuals who were not present at any given round were treated as missing and dropped from the analysis for that round due to lack of outcome data.”

4. I would have expected the results section to have reported on the incidence of the outcome measure – this is not mentioned at all in the text and is somewhat cryptically reported in Table 2 (wrongly labeled “sample mean”) and more appropriately in Table 3. However, the actual numbers positive are never reported by randomized group, which is highly desirable (and I believe required by the CONSORT guidelines).

**We have now added the number of positives by study arms at the bottom of table 2 and we have relabeled correctly the number of positives. We also report the number of positives at month 12 in the outcomes and estimation section of the text.**

5. Please note that the logistic regression model will have estimated odds ratios and not relative risks. With an incidence rate of 12% the figures will be close to relative risks but they should be described properly.

**Our tables do in fact report relative risks, not odds ratios. We understand that there is some difference in use of the term relative risk, but we are using the term in the same sense as indicated in the BMJ Clinical Evidence glossary (<http://clinicalevidence.bmj.com/ceweb/resources/glossary.jsp>). Although logistic regression will yield estimated odds ratios, we have transformed the effects into relative risks using the “margins” and “nlcom” commands in *Stata 12* (using the method as recommended e.g. in: Kleinman LC, Norton EC. What’s the risk? a simple approach for estimating adjusted risk measures from nonlinear models including logistic regression. *Health Services Research* 2009; 44: 288-302). This is now explicitly stated in the “Statistical methods” section of the text.**

**We prefer to report the relative risks for two reasons. First, this was an interdisciplinary project, and while we believe that publication in BMJ is highly appropriate, we also want the magnitudes to be readily interpretable by other audiences as well such as economists who do not typically use odds ratios. Second is the related point referred to by the reviewer, that with an incidence rate of .12, the odds ratio will show a larger reduction than the relative risk. For example, where we report a relative risk of 0.73, the corresponding odds ratio would have been reported as 0.69. To avoid the problem of readers having to do the calculation themselves to understand how different the odds ratio is from the more interpretable relative risk, we prefer to directly report the relative risk.**

6. The results section on "outcomes and estimation" focused on the statistical significance of the comparisons, with very little "estimation" of treatment effects for the main comparisons. It would be helpful to give the estimates

(with 95% CIs) in this section – for example you can state that the unadjusted analysis estimated a reduction in the odds of STI of 20% (95% CI: 6% increase to 46% reduction) at 12 months, whereas the adjusted model estimated a reduction of 27% (95% CI: 1% to 53% reduction)

**We have now provided this statement of estimates of the effects for the main results (high value CCT group at month 12) for the unadjusted and adjusted model in the outcome and estimation section.**

7. Tables 2 and 3 do not state what the comparator group is for computation of the relative risks (odds ratios). Inclusion of standard errors in these tables probably isn't helpful – they are figures on the log odds ratio scale. The confidence intervals are more useful, and should a reader require a standard error they could be computed from these values.

**Expanded notes under tables 2 and 3 now indicate that the reference group for the computation of the relative risks is the control group. We have removed the standard errors from tables 2 and 3, retaining the confidence intervals.**

8. There is no explanation of how the adjustment variables were chosen, whether they were prespecified (the protocol has no statistical methods section so I would presume that they were not prespecified) and the manner in which they were categorized or used as continuous measures. The comparison of the effect in males and females must have been undertaken using a test of interaction but this is not currently mentioned.

**While the adjustment variables were not explicitly pre-specified in the protocol, they are standard socio-demographic variables. We have now indicated in the statistical methods that age and income are continuous variable and that the other adjustment variables are categorical. In the outcomes and estimation sub-section of the results section, we now make clear that we ran a test of interaction for the difference between males and females and that the interaction term for female was not significant.**

9. From the results which have been obtained I am not clear that the authors can conclude with any reasonable degree of certainty that there is a benefit of this intervention. However, the headline for the discussion (and the summary points) is that there was a significant reduction for the higher \$20 payments (opening sentence of discussion). However, this reduction was only observed as being statistically significant when adjustments were made, only at one of the three time points, and only when the serum tests were not considered. It therefore

seems to be an overstatement of the findings.

**We have revised the headline of the discussion to make clear that the statistically significant results were only obtained in the adjusted model and only at month 12 and not at earlier time points, for the high value cash payments and for the serum tests. We would be even more tentative if the results were only statistically significant during an early time point rather than the final time point; however the pattern of increasing effect over time is consistent with our a priori hypothesis and indeed is the reason why we structured the intervention to have multiple incentivized testing rounds. As noted in the “Interpretation” section, “the impact of the conditional cash transfer may take time to materialize, perhaps because it is not easy to extricate oneself from complicated sexual relationships, or perhaps because participants needed time to become accustomed to (and trust) the incentive mechanism.”**

10. One conclusion from the trial (mentioned in the abstract) is that a further study needs to be done to clarify the magnitude of the benefit. This statement is presumptive about there being a proven benefit, and one wonders how well the case can be made for a larger trial which would be needed (probably requiring over 10,000 participants).

**In the abstract and the summary box, we now say that the intervention is “potentially promising” rather than promising and we add that a larger study would be useful to clarify the effect size, to calibrate the size of the incentive, and to determine whether the intervention can be delivered cost effectively.**
